1

2

## Universal metabolic constraints on the thermal tolerance of marine phytoplankton

3

4

5 Samuel Barton<sup>1\*</sup>, James Jenkins<sup>1</sup>, Angus Buckling<sup>1</sup>, C.-Elisa Schaum<sup>1</sup>, Nicholas Smirnoff<sup>2</sup> &  
6 Gabriel Yvon-Durocher<sup>1\*</sup>

7

8 <sup>1</sup> Environment and Sustainability Institute, University of Exeter, Penryn Campus, Penryn, Cornwall  
9 TR10 9EZ, UK,

10 <sup>2</sup> Biosciences, College of Life and Environmental Sciences, Geoffrey Pope Building University of  
11 Exeter, Exeter, EX4 4QD, UK

12 \*for correspondence, email: [G.Yvon-Durocher@exeter.ac.uk](mailto:G.Yvon-Durocher@exeter.ac.uk) , [sb384@exeter.ac.uk](mailto:sb384@exeter.ac.uk)

13

14 **Keywords:** Phytoplankton physiology, climate change, evolutionary ecology, metabolic  
15 temperature dependence, thermal performance curves

16

## 17 **Abstract**

18 **Marine phytoplankton are responsible for over 45% of annual global net primary**  
19 **production. Ocean warming is expected to drive massive reorganisation of**  
20 **phytoplankton communities, resulting in pole-ward range shifts and sharp declines in**  
21 **species diversity, particularly in the tropics. The impacts of warming on phytoplankton**  
22 **species depend critically on their physiological sensitivity to temperature change,**  
23 **characterised by thermal tolerance curves. Local extinctions arise when temperatures**  
24 **exceed species' thermal tolerance limits. The mechanisms that determine the**  
25 **characteristics of thermal tolerance curves (e.g. optimal and maximal temperatures)**  
26 **and their variability among the broad physiological diversity of marine phytoplankton**  
27 **are however poorly understood. Here we show that differences in the temperature**  
28 **responses of photosynthesis and respiration establish physiological trade-offs that**  
29 **constrain the thermal tolerance of 18 species of marine phytoplankton, spanning**  
30 **cyanobacteria as well as the red and green super-families. Across all species we found**  
31 **that rates of respiration were more sensitive to increasing temperature and typically**  
32 **had higher optimal temperatures than photosynthesis. Consequently, the fraction of**  
33 **photosynthetic energy available for allocation to growth (carbon-use efficiency) declined**  
34 **exponentially with rising temperatures with a sensitivity that was invariant among the**  
35 **18 species. Furthermore, the optimal temperature of growth was generally lower than**  
36 **that of photosynthesis and as a result, supra-optimal declines in growth rate were**  
37 **associated with temperature ranges where the carbon-use efficiency exhibited**  
38 **accelerated declines. These highly conserved patterns demonstrate that the limits of**  
39 **thermal tolerance in marine phytoplankton are underpinned by common metabolic**  
40 **constraints linked to the differential temperature responses of photosynthesis and**  
41 **respiration.**

42

## 43 **Significance Statement**

44 The impacts of warming on marine phytoplankton depend on their sensitivity to rising  
45 temperatures, yet there is currently limited understanding of the mechanisms that limit  
46 thermal tolerance among the diversity of marine phytoplankton. Using a comparative study  
47 on the dominant, ecologically important lineages of marine phytoplankton –  
48 Bacillariophyceae, Dinophyceae, Cyanophyceae, Prasinophyceae, Prymnesiophyceae – we

49 show that rates of respiration are consistently more sensitive to increasing temperature than  
50 photosynthesis. Consequently, the fraction of photosynthetic energy available for growth  
51 declines with rising temperatures with a sensitivity that is invariant among species. Our  
52 results suggest that declines in phytoplankton performance at high temperatures are driven by  
53 universal metabolic constraints linked to rising respiratory costs eventually exceeding the  
54 supply of reduced carbon from photosynthesis.

55

## 56 Introduction

57 The planet's oceans are changing at an unprecedented rate (1); over the past half-  
58 century average sea surface temperatures have been increasing by 0.1 °C per decade (2) and  
59 are projected to rise by a further 3°C or more by the end of the century (3). Ocean warming is  
60 thought to be a key driver of recent declines in phytoplankton productivity (4–6), and models  
61 of marine biogeochemistry predict further reductions in productivity over the 21st century as  
62 temperatures exceed limits of thermal tolerance and nutrient limitation increases in warmer,  
63 more stratified oceans (7). Thermal tolerance curves of marine phytoplankton (like all  
64 ectotherms) exhibit characteristic unimodality and left-skew, meaning that fitness declines  
65 more sharply above the optimum temperature than below (8). Marine phytoplankton species  
66 exhibit substantial variability in their thermal tolerance. Optimal temperatures for growth  
67 range between approximately 2 to 38°C and are positively correlated with the average  
68 temperature of the environment, indicating a global pattern of thermal adaptation (8, 9).  
69 Ocean warming is expected to result in major reorganisation of marine phytoplankton  
70 communities as temperatures exceed the thermal optima of some species but not others. In  
71 particular, tropical and sub-tropical regions are projected to experience pronounced declines  
72 in species diversity and productivity (8, 9) because many of the taxa in these areas already  
73 exist close to their limits of thermal tolerance. Despite its importance for predicting the  
74 impacts of global warming on marine phytoplankton communities, we currently understand  
75 very little about the physiological processes that determine the limits of thermal tolerance in  
76 marine phytoplankton.

77 To address this fundamental knowledge gap we carried out a large-scale experiment  
78 to investigate the physiological mechanisms that set the limits of thermal tolerance in marine  
79 phytoplankton. Our experiments span a representative sample of the broad physiological and  
80 phylogenetic diversity of the marine phytoplankton; including 18 species belonging to

81 ecologically important functional groups – Cyanobacteria, Diatoms, Dinoflagellates,  
82 Coccolithophores, Rhodophytes, Chlorophytes and Prasinophytes (Table 1, SI). These  
83 species were chosen to encompass the putative primary and secondary endosymbionts of both  
84 the red and green super-families, and thus reflect the complex evolutionary histories of  
85 marine phytoplankton (10, 11). This allowed for us to investigate whether, in spite of such  
86 physiological diversity in plastid evolution, similar physiological constraints underpin the  
87 limits of thermal tolerance.

88

## 89 Results & Discussion

90 We first characterised variability in thermal tolerance curves among taxa by  
91 measuring growth rates for each species across a temperature gradient spanning 15 to 37°C  
92 and fitting the Sharpe-Schoolfield equation for high temperature inactivation to the data using  
93 non-linear mixed effects modelling (12, 13) (Fig.1). The upper limits of thermal tolerance  
94 varied across the taxa, with  $T_{max}^{\mu}$  (maximum temperature of observed growth), ranging from  
95 27°C to 37°C. The optimal temperature of growth,  $T_{opt}^{\mu}$ , ranged from 23.8°C to 34.0°C and  
96 the activation energy,  $E_a^{\mu}$  – which characterises the increase in rate up to  $T_{opt}^{\mu}$  – ranged from  
97 0.40 eV to 1.46 eV, with an average  $E_a^{\mu}$  of 0.77eV (95% CI: 0.58 to 0.97) (Fig.1, and Table  
98 2, SI). These  $E_a^{\mu}$  values highlight that the temperature dependence of growth at the species  
99 level is significantly higher than previously reported temperature dependence parameters,  
100 such as the canonical Eppley coefficient (equivalent to  $E_a^{\mu} \approx 0.3$  eV), that are derived by  
101 comparing maximum growth rates across many species and are the standard way in which the  
102 impacts of warming on phytoplankton productivity are represented in models of marine  
103 biogeochemistry (14–16). These findings suggest that the Eppley coefficient (and other  
104 values from similar analyses (16)), which capture the broad-scale, macroecological impacts  
105 of temperature along geographic gradients, might significantly under estimate the impacts of  
106 temperature fluctuations on phytoplankton growth at local to regional scales (see  
107 Supplementary Information : additional text, S1, for further discussion).

108 To determine the physiological processes that shape the thermal tolerance curves, in  
109 particular those that determine the optimum temperature and supra-optimal declines in  
110 growth rate, it is essential to understand how the key metabolic pathways that drive biomass  
111 synthesis respond to warming. Despite having diverse evolutionary histories, all unicellular

112 phytoplankton share common, key metabolic pathways (17) and their ability to sequester  
113 carbon, and therefore grow, is ultimately determined by photosynthesis and respiration (18,  
114 19). The light-dependent reactions of photosynthesis account both for the processes that  
115 convert inorganic carbon to organic carbon stores and those that facilitate the production of  
116 ATP and reductant used to fuel biomass synthesis (20). The dark reactions in respiration can  
117 be conceptually divided into ‘growth’ and ‘maintenance’ components (18–21). ‘Growth-  
118 respiration’ provides the ATP, reductant and carbon skeletons required for producing new  
119 biomass and is expected to be proportional to the rate of growth. By contrast, ‘maintenance-  
120 respiration’ provides the ATP for macromolecular turnover and the maintenance of solute  
121 gradients, and is proportional to cell biomass (20). Whilst dark respiration clearly plays an  
122 important role in photolithotrophic growth in microalgae, the majority of the energy used to  
123 fuel biosynthesis (between 60 – 90%) is thought to derive from photosynthesis (20, 21). To  
124 understand the physiological constraints that shape the variability in phytoplankton thermal  
125 tolerance, we quantified temperature-dependent variation in rates of photosynthesis and dark  
126 respiration in the 18 species of marine phytoplankton.

127 For each species, we measured the acute responses of gross photosynthesis and dark  
128 respiration across a temperature gradient spanning 7°C to 49°C, and quantified the resultant  
129 thermal response curves by fitting the Sharpe-Schoolfield equation for high temperature  
130 inactivation to the data using non-linear mixed effects modelling (see Methods). We found  
131 consistent differences in the parameters characterising the thermal responses of  
132 photosynthesis and respiration across all the species in this study despite their diverse  
133 evolutionary histories (Fig.2, Fig.3 and 4, SI). The activation energy for respiration was  
134 greater than that of photosynthesis (i.e.  $E_a^R > E_a^P$ ; Fig. 3B, Fig. 3 and 4, SI) in all 18  
135 species. Pooling the parameters across species yielded an average activation energy for  
136 photosynthesis of  $E_a^P = 0.74$  eV (95% CI: 0.69 to 0.79), whilst the average for respiration was  
137  $E_a^R = 1.07$  eV (95% CI: 0.98 to 1.15). Critically, the average activation energy for  
138 photosynthesis was statistically indistinguishable from that of growth rate ( $E_a^\mu = 0.77$ eV, 95%  
139 CI: 0.58 to 0.97). These results demonstrate that respiratory costs become an increasingly  
140 large proportion of photosynthetic carbon fixation and biomass synthesis as temperatures rise  
141 toward the peak of the thermal response curves. We also found that for most species, the  
142 optimum temperature for respiration was higher than that of photosynthesis (i.e.  $T_{opt}^R >$   
143  $T_{opt}^P$ ), with the average thermal optimum for photosynthesis,  $T_{opt}^P = 31.18^\circ\text{C} \pm 0.83$  (s.e.m.)  
144 and respiration,  $T_{opt}^R = 32.91^\circ\text{C} \pm 0.48$  (s.e.m.) (Fig. 3C, Fig. 3 and 4, SI). Furthermore, in

145 all species, the deactivation energy, which characterises the speed that rates decline past the  
146 optimum, was lower for respiration relative to photosynthesis (i.e.  $E_h^P > E_h^R$ ), with the  
147 average across species for photosynthesis  $E_h^P = 6.08$  (95% CI: 5.04 to 7.12) and respiration  
148  $E_h^R = 2.62$  (95% CI: 2.31 to 2.93) (Fig. 3D, Fig. 3 and 4, SI). Thus, as temperatures rise  
149 beyond  $T_{opt}$ , rates of photosynthesis decline faster than rates of respiration. Overall these  
150 findings show remarkable consistency across diverse taxa (Fig. 3 and 4, SI) in how  
151 differences in the parameters that characterise the thermal responses of photosynthesis and  
152 respiration result in increasing respiratory expenditure of carbon fixed by photosynthesis as  
153 temperatures rise.

154 The carbon-use efficiency (CUE =  $1-R/P$ ), is an estimate of the fraction of  
155 photosynthetic energy ( $P$ ) that can be allocated to growth after accounting for respiration ( $R$ ).  
156 Recent work on both marine and freshwater phytoplankton species suggests that declines in  
157 CUE at high temperature may be linked to impaired performance at supra-optimal  
158 temperature (22, 23). Furthermore, observations that the evolution of elevated thermal  
159 tolerance are coupled with adaptive shifts in metabolic traits that increase CUE at high  
160 temperature (22–24), imply an important role for CUE in constraining thermal tolerance that  
161 could provide a general explanation for high-temperature impairment of growth across the  
162 diversity of the phytoplankton. To determine whether the differential thermal responses of  
163 photosynthesis and respiration can help explain the physiological processes that constrain the  
164 thermal tolerance curves of diverse phytoplankton, we quantified how the CUE varied as a  
165 function of temperature. Consistent with previous work, we found that the CUE decreased  
166 with increasing temperature in all 18 species. Declines in the CUE with rising temperature  
167 were however highly non-linear, with the fall in CUE dramatically accelerating at high  
168 temperatures. Because  $T_{opt}^R > T_{opt}^P$  and  $E_h^P > E_h^R$  for most species, as temperature rose  
169 beyond  $T_{opt}^P$  the CUE exhibited an accelerated decline at high temperatures. To quantify this  
170 non-linear response and the location of the inflection point where declines in CUE become  
171 accelerated, we fitted a break-point model to the thermal responses of the CUE. We found a  
172 significant break-point in the thermal response of the CUE for all 18 species that was tightly  
173 coupled with  $T_{opt}^P$  (Fig.3). As  $E_a^R > E_a^P$  for all species, temperature dependent declines in  
174 CUE up to the break-point were universal across the species (Fig.4) with an average  
175 activation energy,  $E_a^{CUE}$ , of  $-0.12\text{eV}$  (95% CI:  $-0.16$  to  $-0.08$ ). Furthermore, in all 18 species  
176 the optimum temperature for growth ( $T_{opt}^\mu$ ) either coincided with the CUE break-point (i.e.

177 the 95% CIs of the CUE break-point included  $T_{opt}^{\mu}$ ), or was lower than the CUE break-point  
178 (Fig.3). This finding suggests that temperature-driven declines in the CUE, linked to  
179 fundamental differences in the intrinsic thermal responses of photosynthesis and respiration,  
180 could play an important role in constraining the thermal tolerance of diverse marine  
181 phytoplankton. Because the metabolic costs for repair and maintenance are largely accounted  
182 for by dark respiration (20, 21) the temperature-driven declines in the CUE likely reflect  
183 increases in the costs associated with maintenance and repair of heat-induced cellular damage  
184 that eventually exceed the rate of substrate supply by photosynthesis, causing rates of growth  
185 to decline at supra-optimal temperatures.

186 It is important to note that our experiments were conducted under nutrient replete  
187 conditions. A recent study has suggested that the temperature sensitivities of photosynthesis  
188 and respiration (25) in some marine phytoplankton may decline under nutrient limitation and  
189 that the differential temperature sensitivities of photosynthesis and respiration may be  
190 negligible under limited conditions. This work however quantified the temperature  
191 sensitivities of photosynthesis and respiration at only 3 or 4 temperatures leading to estimates  
192 of thermal sensitivities with large error margins and a high probability of generating type II  
193 errors (i.e. accepting the null hypothesis of no difference in the thermal sensitivity of  
194 photosynthesis and respiration). Furthermore, measurements were made only under resource  
195 limited conditions precluding a quantitative comparison with nutrient replete conditions via  
196 the same methodology. Whilst we expect that the absolute values of the thermal sensitivities  
197 of photosynthesis and respiration are likely to decline under resource limitation, it is highly  
198 improbable that the intrinsic differences between photosynthesis and respiration documented  
199 in this study under nutrient replete conditions will be erased under nutrient limitation. Indeed,  
200 our analyses demonstrate that light limitation had a negligible impact on the temperature  
201 sensitivity of photosynthesis and in particular, the fundamental differences in the impacts of  
202 temperature on photosynthesis and respiration were preserved under light limited conditions  
203 (see Fig.2 and Table 6, SI). We therefore anticipate that the supra-optimal declines in growth  
204 linked to temperature-driven decoupling between photosynthesis, respiration and biomass  
205 synthesis that we have shown here, apply equally under nutrient replete and limited  
206 conditions. Whilst large areas of the global ocean are under nutrient limited conditions for  
207 long periods (26), understanding the impacts of temperature under nutrient replete conditions  
208 (as we have done here) remains critically important because a large proportion of marine  
209 primary productivity occurs during episodic bloom events driven by short periods of



210 increased nutrient concentrations (27–29). Clearly, significant further work is required to  
211 understand the interplay between temperature and nutrient availability on phytoplankton  
212 physiology and to assess whether the patterns we have shown here apply to conditions of  
213 nutrient limitation, given that current experimental evidence (25) is not sufficient to draw  
214 meaningful conclusions.

215

## 216 Conclusions

217 Overall, our findings highlight marked similarities in the temperature dependence of  
218 photosynthesis and respiration across diverse taxonomic groups, spanning the cyanobacteria  
219 and red and green super families and suggest that common physiological trade-offs underpin  
220 the thermal tolerance of marine phytoplankton. We found that rates of respiration were more  
221 sensitive to temperature, had higher thermal optima and declined less abruptly past the  
222 optimum than those of photosynthesis. Consequently, the fraction of photosynthetic energy  
223 available for allocation to growth (the CUE) exhibited an accelerated decline with rising  
224 temperatures in a manner that was highly conserved among the 18 species investigated. We  
225 also found that the optimal temperature for growth coincided with, or was lower than, an  
226 inflection point in the temperature dependence of the CUE, which marked a transition that led  
227 to accelerated declines at high temperatures. These patterns suggest that universal metabolic  
228 constraints driven by the differential temperature sensitivity of photosynthesis and respiration  
229 play a key role in setting the limits of thermal tolerance of diverse marine phytoplankton. Our  
230 results therefore help pave the way for improving representations of phytoplankton  
231 biodiversity in models of ocean biogeochemistry by providing a process-based understanding  
232 of the factors that shape the limits of temperature tolerance for diverse species of marine  
233 phytoplankton, which can be used to aid predictions of immigration and local extinctions  
234 driven by global warming.

235

## 236 Methods

### 237 **Culturing of marine phytoplankton strains**

238 18 marine phytoplankton strains were obtained from CCAP (The Culture Collection of Algae  
239 and Protozoa) and RCC (Roscoff Culture Collection) between autumn 2015 and spring 2016.



240 Strains of eukaryotic phytoplankton were selected from phylogenetic groups of both the red  
241 and green superfamilies (10, 11), in addition to two strains of cyanobacteria. We tried to  
242 work with organisms that had been well studied in the literature, were known to be globally  
243 abundant and play crucial roles for marine ecology and global carbon cycling. The strains  
244 were originally isolated from a range of latitudes and some have been in culture for up to 65  
245 years (Table 1, SI). Stocks of each of the strains were cultured on their previous culture  
246 collection medium (Table 1, SI) using artificial sea water. The following media were used:  
247 Guillard's F/2 and F/2 + Si, Keller's K, K + Si and K/2, and PCR-S11 Red Sea medium (with  
248 Red Sea salts). All stock cultures were incubated in Infors HT incubators at 20°C, under a  
249 12:12 hour light-dark cycle with a PAR intensity of 45-50  $\mu\text{mol m}^2 \text{s}^{-1}$  and shaken at 65RPM.  
250 Where possible we tried to obtain strains from the culture collections that matched, or were  
251 close to, these conditions. The red alga *Porphyridium purpureum* was an exception, which we  
252 cultured at 20-25  $\mu\text{mol m}^2 \text{s}^{-1}$ . Cultures were kept under exponential, nutrient replete, growth  
253 conditions for ~ 2 months before any physiological data was collected.

254

### 255 **Measuring the thermal tolerance curve**

256 For each species, a minimum of 3 technical replicates were inoculated with the same starting  
257 density into fresh growth medium across a range of temperatures (15°C - 37°C). Cell counts  
258 were made daily using flow cytometry (Accuri C6 flow cytometer, BD Scientific), and  
259 population density was tracked until cultures reached carrying capacity. Per capita growth  
260 rates ( $\mu$ ) were quantified from a modified Baranyi growth model without the lag phase(30),  
261 using non-linear least squares regression via the 'nlsMicrobio' package in R statistical  
262 software (v3.3.1). Models were fitted using the 'nlsLoop' function in the R github package  
263 'nlsLoop'. This draws on the 'nlsLM' function in the 'minpack.lm' R package, which uses a  
264 modified Levenberg-Marquardt optimisation algorithm. Model parameters were determined  
265 by running 2000 random combinations of estimated starting parameters, which were then  
266 selected using the Akaike Information Criterion (AIC) to determine the set of parameters that  
267 best characterised the data. Growth rates derived for each technical replicate at each growth  
268 temperature were then used to determine the thermal tolerance curves (Fig.1A).

### 269 **Estimates of Cell Carbon and Nitrogen**

270 For each species, an exponentially growing culture from the 20°C stock was divided into 3  
271 technical replicates and centrifuged at 3500RPM, at 4°C for 30 minutes. The resultant pellets

272 were rinsed with deionised water and re-spun 3 times to remove any artificial sea water  
273 residue. For the calcifying organisms (*Emiliana huxleyi*, *Gephyrocapsa oceanica*,  
274 *Thoracosphaera heimii* i.e. those with a calcium carbonate coccoliths) it was necessary to  
275 dissolve the extra-cellular inorganic carbon (31, 32). This was achieved by treating these  
276 pellets with 0.5 mL of 3M HCl for 1 hour before being rinsed with deionised water and re-  
277 pelleted. All pellets were freeze-dried using a CoolSafe (95-15 PRO, ScanVac) over 24 hours  
278 and then weighed to obtain dry weight. Samples were placed in tin cups and sent to Elementex  
279 (Elementex Ltd, Cornwall, UK, PL17 8QS) for elemental analysis of %C and %N using a  
280 SerCon Isotope Ratio Mass Spectrometer (CF-IRMS) system (continuous flow mode). For  
281 each technical replicate we then calculated the C:N ratio as well as  $\mu\text{g C cell}^{-1}$  (Table 3, SI).

282

### 283 **Measuring the metabolic thermal response curves**

284 Measurements of photosynthesis and dark respiration were collected across a range of assay  
285 temperatures (7°C to 49°C) for a minimum of 3 biological replicates per species. We used a  
286 clark-type oxygen electrode as part of a Chlorolab 2 system (Hansatech Ltd, King's Lynn,  
287 UK) to measure net rates of oxygen evolution in the light (net primary production, NP) and  
288 oxygen consumption in the dark (dark respiration); both in units of  $\mu\text{mol O}_2 \text{ mL}^{-1} \text{ s}^{-1}$ . All  
289 biological replicates were sampled from the stock cultures, which had all been growing at  
290 20°C and were taken at the mid-logarithmic growth phase to ensure that the samples were not  
291 substrate limited. To improve the signal to noise ratio when measuring rates, all biological  
292 replicate samples were concentrated by centrifugation at 1500rpm, 20°C, for 15 minutes and  
293 re-suspended into an adequate volume of fresh growth medium. Prior to running a sample at  
294 each assay temperature, all samples were given ~ 15 minutes to pre-acclimate to the assay  
295 temperature in the dark before any data was collected. This also gave the electrode system  
296 sufficient time to stabilise before metabolic rates were measured. This was necessary for two  
297 reasons, i) as the sample adjusts to the assay temperature this will naturally cause changes in  
298 the dissolved oxygen concentration, ii) the electrode system results in oxygen signal drift, and  
299 this too is temperature dependent. We measured rates of oxygen depletion from 21 sterilised  
300 artificial seawater samples across a range of temperatures 4°C - 44°C and found that the  
301 impact of drift was minimised after ~15 minutes of stabilisation time. Nevertheless, signal  
302 drift was linearly temperature dependent after this time. To account for drift in our dataset we  
303 corrected all our raw data using the following empirically derived relationship:

304  $drift = (-0.392 \times T) - 6.51$  [1]

305 Where  $T$  is assay temperature ( $^{\circ}\text{C}$ ), and  $drift$  is the non-biological depletion in oxygen  
306 concentration measured in units  $\mu\text{molO}_2 \text{ mL}^{-1} \text{ s}^{-1}$  after approximately 15 minutes of  
307 stabilisation. The raw  $\text{O}_2$  flux data was then corrected by subtracting the estimated drift.  
308 Rates of net photosynthesis, measured as  $\text{O}_2$  evolution, were collected across a range of light  
309 intensities from 0 to  $1800 \mu\text{mol m}^2 \text{ s}^{-1}$  with increments of  $50 \mu\text{mol m}^2 \text{ s}^{-1}$  between 0 to 200  
310  $\mu\text{mol m}^2 \text{ s}^{-1}$ ,  $100 \mu\text{mol m}^2 \text{ s}^{-1}$  between 200 and  $1000 \mu\text{mol m}^2 \text{ s}^{-1}$ , followed by  $1200 \mu\text{mol m}^2 \text{ s}^{-1}$   
311  $^1$ ,  $1500 \mu\text{mol m}^2 \text{ s}^{-1}$  and finally  $1800 \mu\text{mol m}^2 \text{ s}^{-1}$ . This enabled us to model a photosynthesis-  
312 irradiance (PI) curve for each assay temperature, and therefore obtain an estimate of light  
313 saturated net photosynthesis,  $NP_{max}$ , see Eq. 2. Respiration ( $R$ ) was measured as oxygen  
314 consumption in the dark, over a 3-minute period directly following the light response outlined  
315 above. The photosynthesis-irradiance curve was then quantified by fitting Eiler's  
316 photoinhibition model to the data using non-linear least squares regression (as described  
317 above) (33, 34):

318 
$$NP(I) = \frac{NP_{max}I}{\frac{NP_{max}}{\alpha I_{opt}^2}I^2 + \left(1 - 2\frac{NP_{max}}{\alpha I_{opt}}\right)I + \frac{NP_{max}}{\alpha}}$$
 [2]

319 Where  $NP(I)$  is the rate of net primary production at light intensity,  $I$ ,  $NP_{max}$  is the  
320 maximum rate of  $NP$  at the optimal light intensity,  $I_{opt}$ , and  $\alpha$  is the rate in which  $NP$   
321 increases up to  $NP_{max}$ .

322 Light saturated gross primary production ( $P$ ) was then calculated for each assay temperature  
323 as:

324  $P = NP_{max} + R$  [3]

325 To investigate the effect of light limitation on the temperature dependence of photosynthesis  
326 we used Eq. 2 to determine the predicted  $NP$  at half the light saturated irradiance ( $0.5 \times$   
327  $I_{opt}$ ). Thus replacing in  $NP_{max}$  in Eq. 3 with this prediction we derived  $P_{0.5}$ , a light limited  
328 value of gross primary production at half the saturating irradiance for each assay temperature  
329 response.

330 Metabolic rates were then converted from units  $\mu\text{mol O}_2 \text{ mL}^{-1} \text{ s}^{-1}$  to  $\mu\text{g C } \mu\text{g C}^{-1} \text{ hour}^{-1}$ . We  
331 achieved this using the following equation:

$$332 \quad b(\mu\text{g C } \mu\text{g C}^{-1} \text{ h}^{-1}) = \frac{b(\mu\text{mol O}_2 \text{ cell}^{-1} \text{ h}^{-1}) \times 32 \times M \times \left(\frac{12}{44}\right)}{\mu\text{gC cell}^{-1}} \quad [4]$$

333 Where  $b$  is the metabolic rate (either  $P$  or  $R$ ), 32 is the molecular weight of  $\text{O}_2$ ,  $M$  is a species  
 334 specific assimilation quotient for  $\text{CO}_2:\text{O}_2$  (35) which is used to describe consumption or  
 335 fixation of C in the cell per unit of  $\text{O}_2$ , and 12/44 is the ratio of molecular weight of C to  $\text{CO}_2$ ,  
 336 thus  $32 \times M \times \frac{12}{44}$  converts from  $\mu\text{mol O}_2$  to  $\mu\text{gC}$ . Samples from each strain were analysed  
 337 to determine species-specific  $\mu\text{g C cell}^{-1}$  values and the number of cells  $\text{mL}^{-1}$  was  
 338 measured for each biological replicate using flow cytometry. The calculation of  $M$  is based  
 339 on the assumption that  $\text{NO}_3^-$  is the main nitrogen source in the growth medium and that there  
 340 is a balanced growth equation, where:

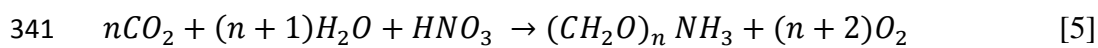

342 If the C:N ratio ( $n$ ) of the phytoplankton is calculated in moles then the ratio of  $\text{CO}_2:\text{O}_2$ , or  $M$ ,  
 343 will be equal to  $n/n+2$  (35). Our calculated values of  $M$  ranged from ~0.71 to ~0.89 (Table 3,  
 344 SI).

### 345 **Quantifying the thermal response curves**

346 The thermal response curves for rates of growth, photosynthesis (at both saturated and half  
 347 saturated irradiance) and respiration were quantified using a modified version of the Sharpe-  
 348 Schoolfield equation (12, 13):

$$349 \quad \ln(b(T)) = E_a \left( \frac{1}{kT_c} - \frac{1}{kT} \right) + \ln(b(T_c)) - \ln \left( 1 + e^{E_h \left( \frac{1}{kT_h} - \frac{1}{kT} \right)} \right) \quad [6]$$

350 where  $b$  is either the rate of growth ( $\text{d}^{-1}$ ), photosynthesis or respiration ( $\mu\text{g C } \mu\text{g C}^{-1} \text{ h}^{-1}$ ),  $k$  is  
 351 Boltzmann's constant ( $8.62 \times 10^{-5} \text{ eV K}^{-1}$ ),  $E_a$  is the activation energy (eV), indicative of the  
 352 steepness of the slope leading up to the thermal optima,  $T$  is temperature in Kelvin (K),  $E_h$  is  
 353 the deactivation energy which characterizes temperature-induced decrease in rates above  $T_h$   
 354 where half the enzymes have become non-functional and  $b(T_c)$  is rate normalized to an  
 355 arbitrary reference temperature, here  $T_c = 20^\circ\text{C}$  (+ 273.15), where no low or high temperature  
 356 inactivation is experienced. Eq. 6 can be used to derive an optimum temperature where the  
 357 maximum rate is predicted:

$$358 \quad T_{opt} = \frac{E_h T_h}{E_h + k T_h \ln \left( \frac{E_h}{E_a} - 1 \right)} \quad [7]$$

359 The parameters  $b(T_c)$ ,  $E_a$ ,  $E_h$ ,  $T_h$ , and  $T_{opt}$ , can be considered as traits that characterise the  
360 unimodal response of biological rates to temperature change. We expect these traits to differ  
361 across the diverse taxa analysed in this study, owing to their diverse evolutionary histories  
362 and ancestral temperature regimes (given that they have been isolated from different  
363 latitudes/oceans). To test this assumption, we fitted the data for growth, photosynthesis and  
364 respiration across all species to Eq. 6 using non-linear mixed effects modelling with the  
365 ‘nlme’ package in R. We used separate analyses to assess the thermal responses of growth,  
366 photosynthesis and respiration. All models included each of the parameters in Eq. 6 as fixed  
367 effects, which quantify the average value of the parameter across all species and replicates.  
368 For the analysis of the thermal response of growth rate, we included ‘species’ as a random  
369 effect on each parameter, which quantifies species-specific deviations from the average  
370 across all species (i.e. the fixed effect) that are assumed to be normally distributed with a  
371 mean of zero. For the analyses of photosynthesis and respiration, we included ‘replicate’  
372 nested within ‘species’ to account for the fact that we measured a minimum 3 replicate  
373 thermal response curves for each species. Here the random effect quantifies species-specific  
374 deviations from the fixed effects as well as those attributable to variance among the replicates  
375 of each species.

376 Because the Sharpe-Schoolfield equation can only take non-zero and positive rate values, in  
377 instances where either no observed growth rate, or a negative growth rate were measured  
378 (typically the highest and lowest temperature) we set the rate to the minimum value measured  
379 for the species in order to fit the model.

380

### 381 **Quantifying the carbon-use efficiency and modelling the break-point temperature**

382 The carbon-use efficiency (CUE) was calculated as:

$$383 \text{ CUE} = 1 - R/P \quad [8]$$

384 Due to the non-linear temperature response of the CUE, with accelerated declines at high-  
385 temperatures, we fitted a segmented linear regression model to estimate the break-point in the  
386 temperature response after which the CUE exhibited an accelerated decline. We fitted the  
387 segmented linear regression model to CUE values derived from the fitted Sharpe-Schoolfield  
388 curves for each species enabling us to derive an estimate of CUE at every 1°C increment  
389 across the range of assay temperatures where metabolic rates were measured for each species

390 (Fig 2. Main text). We fitted the break-point model to the CUE values using the ‘segmented’  
391 package in R, where the breakpoint estimate is defined in the segmented model as the  
392 intersection where there is significant difference in slopes (36), determined by the Davies test  
393 for performing hypothesis (37). It is for this reason that it was necessary to use the predicted  
394 values of respiration and photosynthesis to derive the break-point, as the measured data in  
395 most cases only provided one or two data points beyond the inflection point, and this would  
396 not have been sufficient to accurately model the second slope beyond this point (Fig.3, Main  
397 text). The model returned an estimate of the CUE break-point temperature and the 95%  
398 confidence intervals surrounding this value for each species (Table 7, SI).

### 399 **Determining the temperature dependence of the CUE**

400 We characterized the temperature dependence of the CUE up to the CUE breakpoint  
401 temperature for each species using the Arrhenius equation,

$$402 \ln \text{CUE}(T) = E_a^{\text{CUE}} \left( \frac{1}{kT_c} - \frac{1}{kT} \right) + \ln \text{CUE}(T_c) \quad [9]$$

403 where  $\ln \text{CUE}(T)$  is the natural logarithm of the CUE at temperature  $T$  (in Kelvin),  $E_a^{\text{CUE}}$  is  
404 the apparent activation energy characterising the temperature dependence of CUE. We  
405 centred the temperature data using an arbitrary reference temperature  $T_c = 283 \text{ K} = 20^\circ\text{C}$ , so  
406 that  $\ln \text{CUE}(T_c)$  is the CUE at  $T_c$ . We fitted Eq. 9 to all the measurements of CUE, up to the  
407 CUE break-point temperature identified for each species (Fig.3 Main text, Table 7, SI) using  
408 a linear mixed effects model. This allowed us to derive an average value for  $E_a^{\text{CUE}}$  and  
409  $\ln \text{CUE}(T_c)$  across the 18 species. We also included random effects of ‘replicate’ nested  
410 within ‘species’ in the model to account for the fact we measured a minimum of 3 replicate  
411 responses of respiration and photosynthesis for each species. This allowed us to capture the  
412 species-specific and replicate specific estimates  $E_a^{\text{CUE}}$  and  $\ln \text{CUE}(T_c)$ .

### 413 **Acknowledgements**

414 This study was supported by a grant from the Leverhulme Trust (RPG-2013-335) awarded to  
415 G.Y.-D., A.B. and N.S.

### 416 **Author contributions**

417 S.B. and G.Y.-D conceived the study. S.B., G.Y.-D, A.B. and N.S. designed the experimental  
418 work. S.B., J.J. and C.-E.S. conducted the experimental work. S.B. and G.Y.-D analysed the  
419 data. S.B. and G.Y.-D wrote the manuscript and all authors contributed to revisions.

420 **References**

- 421 1. Henson S A, et al. (2017) Rapid emergence of climate change in environmental drivers of  
422 marine ecosystems. *Nat Commun* 8(5020):1–9.
- 423 2. Rhein, M. *et al.*(2013) Observations: Ocean Pages. *Climate Change 2013: The Physical.*  
424 *Science Basis. Contribution to Working Group I to the Fifth Assessment Report of the*  
425 *Intergovernmental Panel on Climate Change*, Cambridge University Press, Cambridge,  
426 UK and New York, pp 255–316.
- 427 3. Collins, M. *et al.*(2013) Long-term Climate Change: Projections, Commitments and  
428 Irreversibility. *Climate Change 2013: The Physical. Science Basis. Contribution to*  
429 *Working Group I to the Fifth Assessment Report of the Intergovernmental Panel on*  
430 *Climate Change*, Cambridge University Press, Cambridge, UK and New York, pp  
431 1029–1136.
- 432 4. Boyce DG, Lewis MR, Worm B (2010) Global phytoplankton decline over the past century.  
433 *Nature* 466(7306):591–596.
- 434 5. Behrenfeld MJ, et al. (2006) Climate-driven trends in contemporary ocean productivity.  
435 *Nature* 444(December):752–755.
- 436 6. Capuzzo E, et al. (2018) A decline in primary production in the North Sea over 25 years,  
437 associated with reductions in zooplankton abundance and fish stock recruitment. *Glob Chang*  
438 *Biol* 24:e352–e364.
- 439 7. Laufkötter C, et al. (2015) Drivers and uncertainties of future global marine primary  
440 production in marine ecosystem models. *Biogeosciences* 12:6955–6984.
- 441 8. Thomas MK, Kremer CT, Klausmeier C a., Litchman E (2012) A Global Pattern of Thermal  
442 Adaptation in Marine Phytoplankton. *Science* 338:1085–1088.
- 443 9. Thomas MK, Kremer CT, Litchman E (2016) Environment and evolutionary history determine  
444 the global biogeography of phytoplankton temperature traits. *Glob Ecol Biogeogr* 25:75–86.
- 445 10. Falkowski PG, et al. (2004) The Evolution of Modern Eukaryotic. *Science* 305:354–360.
- 446 11. Keeling PJ (2004) Diversity and evolutionary history of plastids and their hosts. *Am J Bot*  
447 91(10):1481–1493.
- 448 12. Sharpe, PJH, DeMichele, DW (1977) Reaction Kinetics of Poikilotherm Development.  
449 *J. Theor. Biol.* 64, 649–670 .
- 450 13. Schoolfield RM, Sharpe PJH, Magnuson CE (1981) Non-linear regression of biological  
451 temperature-dependent rate models based on absolute reaction-rate theory. *J Theor Biol*  
452 88:719–731.
- 453 14. Eppley RW (1972) Temperature and phytoplankton growth in the sea. *Fish Bull* 70(4):1063–  
454 1085.



- 455 15. Chen B, Laws E a. (2017) Is there a difference of temperature sensitivity between marine  
456 phytoplankton and heterotrophs? *Limnol Oceanogr* 62:806–817.
- 457 16. Kremer CT, Thomas MK, Litchman E (2017) Temperature- and size-scaling of phytoplankton  
458 population growth rates: Reconciling the Eppley curve and the metabolic theory of ecology.  
459 *Limnol Oceanogr* 62:1658–1670.
- 460 17. Quigg A, et al. (2003) The evolutionary inheritance of elemental stoichiometry in marine  
461 phytoplankton. *Nature* 425(6955):291–4.
- 462 18. Shuter B (1979) A model of physiological adaption in unicellular algae. *J Theor Biol* 78:519–  
463 552.
- 464 19. Raven J A., Geider RJ (1988) Temperature and algal growth. *New Phytol* 110:441–461.
- 465 20. Raven J A (1976) The Quantitative Role of ' Dark ' Respiratory Processes in Heterotrophic  
466 and Photolithotrophic Plant Growth. *Ann. Bot.* 40:587–602.
- 467 21. Geider RJ, Osborne B A (1989) Respiration and microalgal growth : a review of the  
468 quantitative relationship. *New Phytol* 112:327–341.
- 469 22. Padfield D, Yvon-Durocher G, Buckling A, Jennings S, Yvon-Durocher G (2016) Rapid  
470 evolution of metabolic traits explains thermal adaptation in phytoplankton. *Ecol Lett* 19:133–  
471 142.
- 472 23. Schaum C-E, Buckling A, Smirnoff N, Studholme DJ, Yvon-Durocher G (2018)  
473 Environmental fluctuations accelerate molecular evolution of thermal tolerance in a marine  
474 diatom. *Nat Commun*:1–14.
- 475 24. Schaum C-E, et al. (2017) Adaptation of phytoplankton to a decade of experimental warming  
476 linked to increased photosynthesis. *Nat Ecol Evol* 1:0094.
- 477 25. Marañón E, Lorenzo MP, Cermeño P, Mouriño-Carballido B (2018) Nutrient limitation  
478 suppresses the temperature dependence of phytoplankton metabolic rates. *ISME J.*  
479 doi:10.1038/s41396-018-0105-1.
- 480 26. Moore CM, et al. (2013) Processes and patterns of oceanic nutrient limitation. *Nat Geosci*  
481 6(9):701–710.
- 482 27. Bruland KW, Rue EL, Smith GJ, DiTullio GR (2005) Iron, macronutrients and diatom blooms  
483 in the Peru upwelling regime: Brown and blue waters of Peru. *Mar Chem* 93:81–103.
- 484 28. Townesend DW, Cammen LM, Holligan PM, Campbell DE, Pettigrew NR (1994) Causes and  
485 consequences of variability in the timing of phytoplankton blooms. *Deep Res Part I*  
486 41(5):747–765.
- 487 29. Pingree RD, Pugh PR, Holligan PM, Forster (1975) Summer phytoplankton blooms and red  
488 tides along tidal fronts in the approaches to the English Channel. *Nature* 258:672–677.
- 489 30. Baranyi J, Roberts T a. (1994) A dynamic approach to predicting bacterial growth in food. *Int*  
490 *J Food Microbiol* 23:277–294.

- 491 31. Raven J A (1976) The Quantitative Role of ' Dark ' Respiratory Processes in Heterotrophic  
492 and Photolithotrophic Plant Growth. *Ann. Bot.* 40:587–602.
- 493 32. Ho T, et al. (2003) the Elemental Composition of Some Marine Phytoplankton. *J Phycol*  
494 39:1145–1159.
- 495 33. Eilers PHC, Peeters JCH (1988) A model for the relationship between light intensity and the  
496 rate of photosynthesis in phytoplankton. *Ecol Modell* 42:199–215.
- 497 34. Edwards KF, Thomas MK, Klausmeier C a., Litchman E (2016) Phytoplankton growth and the  
498 interaction of light and temperature: A synthesis at the species and community level. *Limnol*  
499 *Oceanogr* 61:1232–1244.
- 500 35. Falkowski PG, Gan R, Wyman K (1985) Growth-irradiance relationships in phytoplankton .  
501 *Limnol. Oceanogr.* 30(2):311–321.
- 502 36. Muggeo VMR (2003) Estimating regression models with unknown break-points. *Stat Med*  
503 22:3055–3071.
- 504 37. Davies RB (1977) Hypothesis Testing when a Nuisance Parameter is Unidentified Under the  
505 Alternative. *Biometrika* 64:247–254.
- 506
- 507

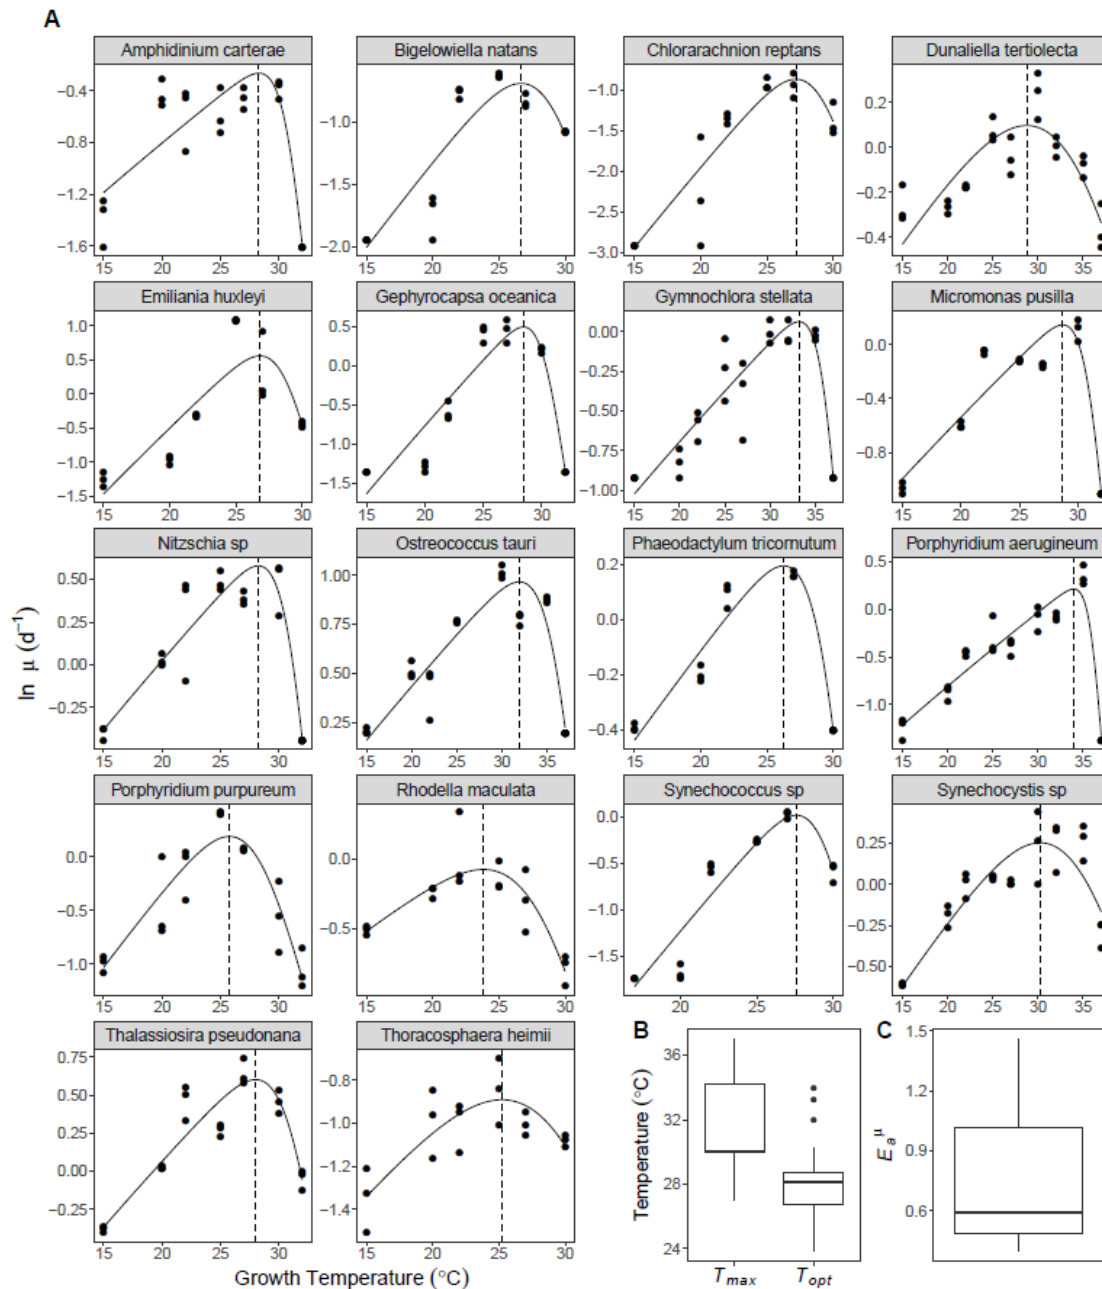

508

509 **Fig. 1. Thermal tolerance curves for 18 species of marine phytoplankton.** (A) Thermal reaction  
 510 norms for all 18 species used in this study. The data points presented are the natural logarithm of per  
 511 capita growth rate,  $\mu$ , for each replicate ( $n$ = minimum of 3 technical replicates per assay temperature  
 512 for each species). The fitted lines are from the predicted random effect of species derived from non-  
 513 linear mixed effects modelling with a Sharpe-Schoolfield model. The vertical dashed lines correspond  
 514 with the optimal temperatures of growth. (B) Boxplot distributions of optimal growth temperatures  
 515 ( $T_{opt}$ ) and maximum temperatures of growth ( $T_{max}$ ) across all 18 species. (C) Boxplot distribution of  
 516 growth activation energy, or temperature dependence ( $E_a^H$ ), across all 18 species (Table 2, SI). The  
 517 bold horizontal line corresponds to the median value, the top and bottom of the box correspond to the  
 518 75<sup>th</sup> and 25<sup>th</sup> percentiles and the whiskers extend to the largest and smallest values no greater or less  
 519 than  $1.5 \times$  the interquartile range, beyond which the points are plotted as outliers.

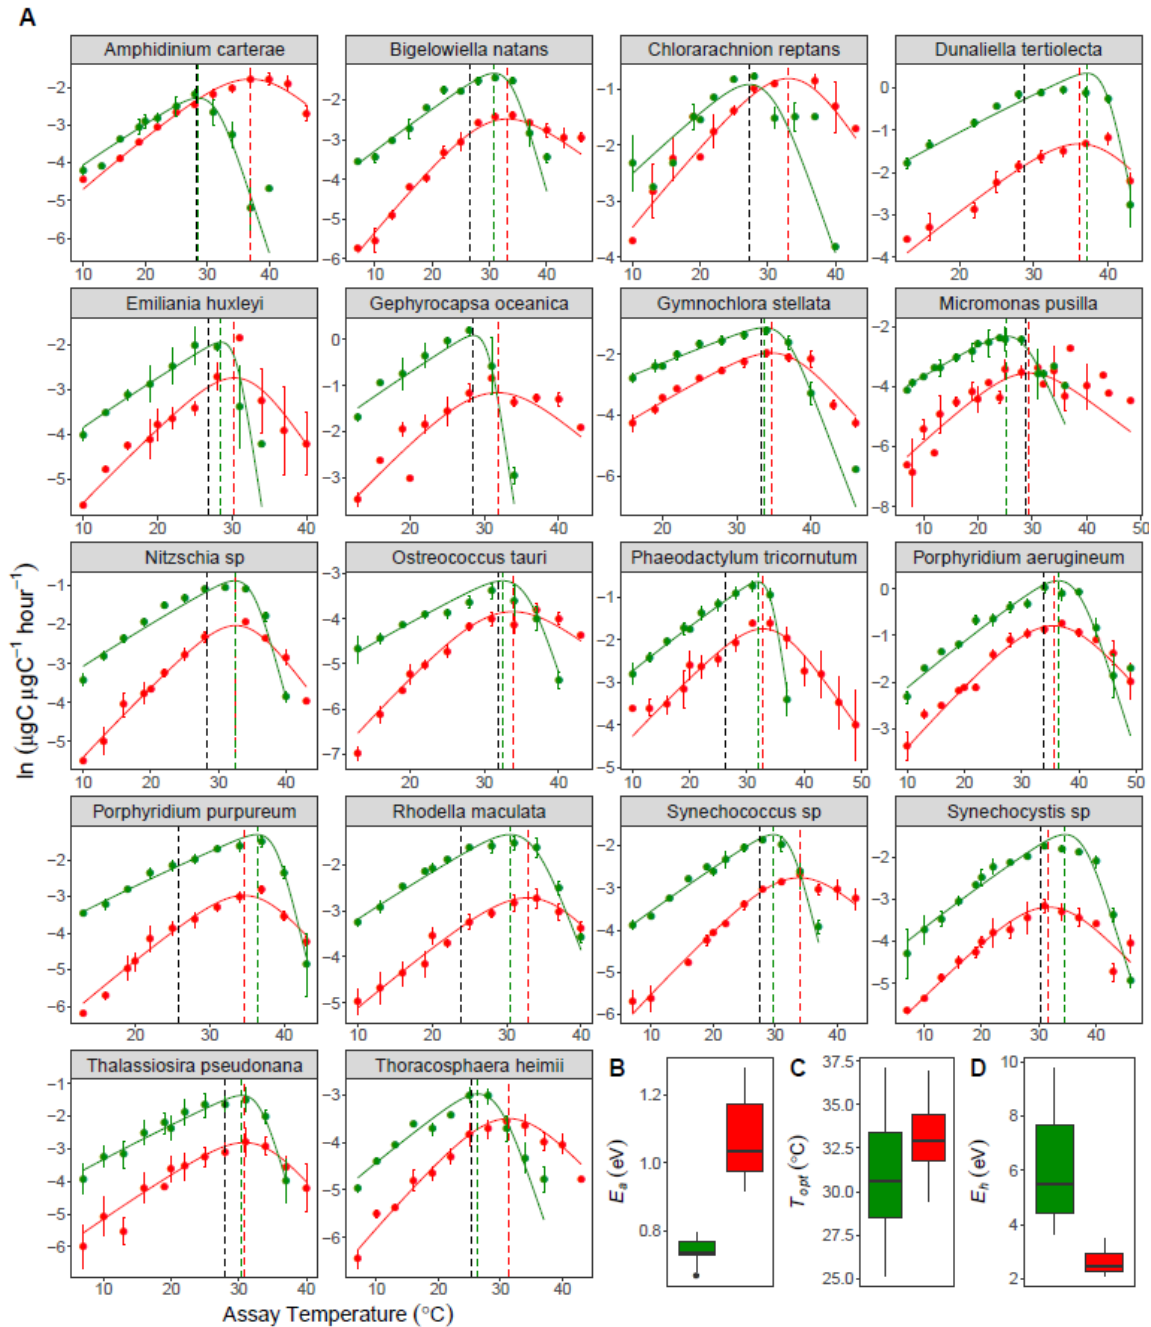

520

521 **Fig. 2. Thermal performance curves for respiration and gross photosynthesis in 18 species of**  
 522 **marine phytoplankton. (A)** Metabolic thermal performance curves for all 18 species used in this  
 523 study. Green colouring denotes gross photosynthesis, red colouring denotes respiration. The data  
 524 points presented are the natural logarithm of mean metabolic, with error bars denoting  $\pm$  s.e.m ( $n$  =  
 525 minimum of 3 biological replicates per response for each species). The fitted lines for each species  
 526 are from the random effects of a non-linear mixed effects model fitted to the rate data using the Sharpe-  
 527 Schoolfield equation (see Methods). The vertical dashed lines correspond with the optimal  
 528 temperatures for each metabolic flux, with the black dashed line added to show optimal growth  
 529 temperature. **(B, C and D)** Boxplots showing the distribution of the estimated values for activation  
 530 energy ( $E_a$ ), optimal temperature ( $T_{opt}$ ) and deactivation energy ( $E_h$ ) for photosynthesis and  
 531 respiration across the 18 species (Tables 4 and 5, SI). The bold horizontal line corresponds to the  
 532 median value, the top and bottom of the box correspond to the 75<sup>th</sup> and 25<sup>th</sup> percentiles and the  
 533 whiskers extend to the largest and smallest values no greater or less than  $1.5 \times$  the interquartile  
 534 range, beyond which the points are plotted as outliers.

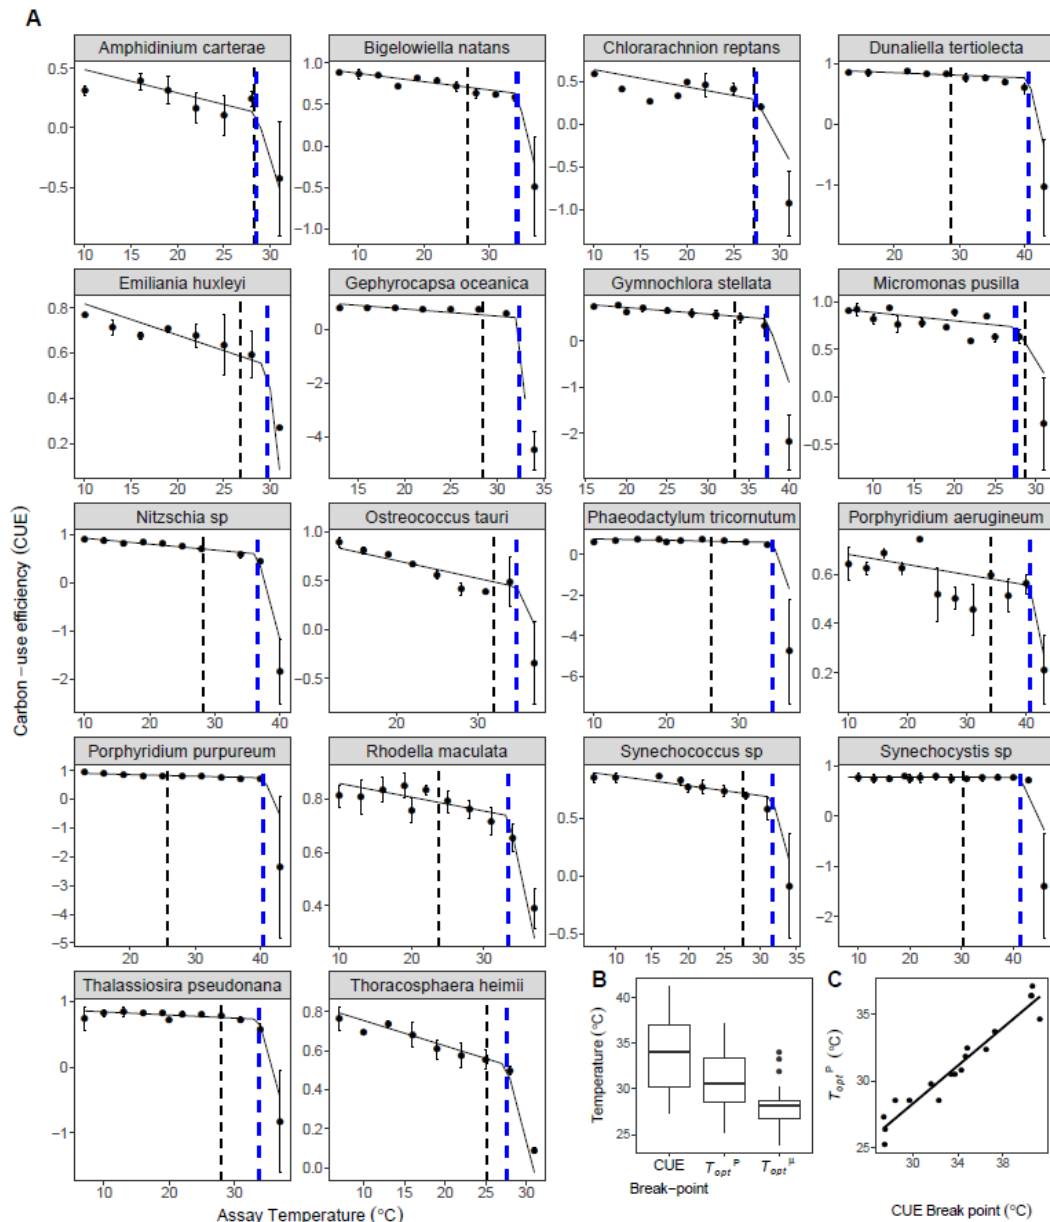

535

536 **Figure 3. Carbon-use efficiency breakpoints constrain the optimal temperature of growth.** (A)  
 537 Segmented linear regression models fitted to the predicted carbon use efficiency (CUE), derived from  
 538 the thermal performance parameters of respiration and photosynthesis for each species (Fig 2). The  
 539 modelled response is presented here alongside the calculated mean CUE at each assay temperature,  
 540 with with error bars denoting  $\pm$  s.e.m ( $n$  = minimum of 3 biological replicates per response for each  
 541 species). The dashed vertical dashed blue line represents the predicted break-point in the model,  
 542 where there was a significant change in the slope of the CUE thermal response. The dashed vertical  
 543 black line represents the estimate optimal temperature of growth (Fig.1). In most cases this either  
 544 coincides with the break-point, falling within the 95% CIs of the break-point, or was lower than the  
 545 break-point. (B) Boxplots showing the distribution of the estimated values for the CUE break-point  
 546 temperature, optimal temperature of gross photosynthesis ( $T_{opt}^P$ ) and optimal temperature of growth  
 547 ( $T_{opt}^H$ ) across the 18 species (Tables 2, 4 and 5, SI). The bold horizontal line corresponds to the  
 548 median value, the top and bottom of the box correspond to the 75<sup>th</sup> and 25<sup>th</sup> percentiles and the  
 549 whiskers extend to the largest and smallest values no greater or less than  $1.5 \times$  the interquartile  
 550 range, beyond which the points are plotted as outliers. (C) The significant coupling between the CUE  
 551 and  $T_{opt}^P$ , illustrating that the sharp declines in CUE are determined by the universal metabolic  
 552 constrains identified in Fig.2.

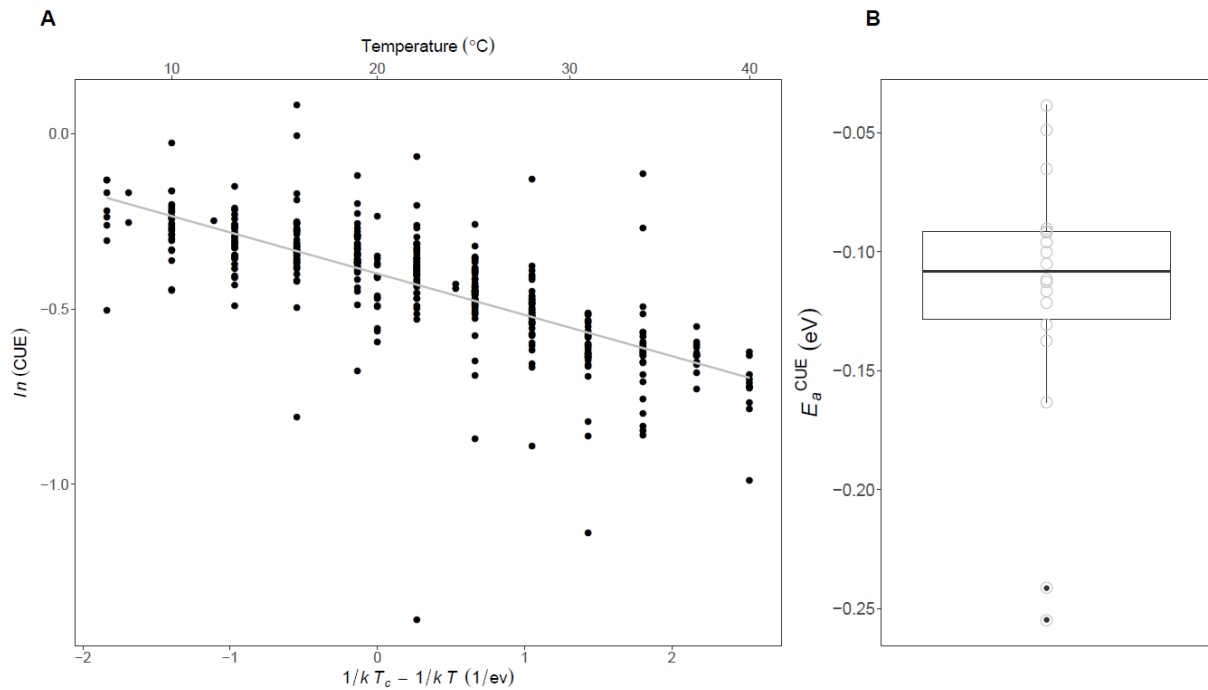

553

554 **Figure. 4. The temperature dependence of the carbon-use efficiency.** (A) A scatterplot showing  
555 the relationship between the natural logarithm of the carbon-use efficiency (CUE) and standardised  
556 Boltzmann temperature up to the CUE break-point (Fig.3) for the pooled dataset of 18 species, where  
557  $T_c = 20^{\circ}\text{C}$  and  $k$  is the Boltzmann constant ( $8.62 \times 10^{-5}$  eV). The fitted line represents the fixed  
558 effect of a linear mixed effects model fitted to the data using the Boltzmann-Arrhenius equation (see  
559 Methods). Values of  $\ln(\text{CUE})$  have been standardised by dividing by the species-specific intercept  
560 derived from the random effects of the mixed effects model. This standardisation was for visualisation  
561 of the data only. The plot demonstrates that the CUE decreases up to the CUE break-point  
562 temperature with a consistent temperature dependence, equating to an average activation energy (  
563  $E_a^{\text{CUE}}$ ) of -0.12eV. (B) Boxplot of the species-specific  $E_a^{\text{CUE}}$  values derived from the linear mixed  
564 effects model. The bold horizontal line corresponds to the median value, the top and bottom of the  
565 box correspond to the 75<sup>th</sup> and 25<sup>th</sup> percentiles and the whiskers extend to the largest and smallest  
566 values no greater or less than  $1.5 \times$  the interquartile range, beyond which the points are plotted as  
567 outliers.

568

569

570
